# Supplementary material for: The Awareness of Pulmonologists and Patients with Respiratory Diseases about the Impact of Air Pollution on Health in Poland
Source: MDPI journal article supplement (doi:10.3390/jcm10122606), 2021-06-12
Supplement: s1 [file s1]

**Questionnaire investigating awareness of physicians about the impact of air pollution on health**

**SEX** M ☐ F ☐ **Age** ..... **Place of residence (city)** .....

**Medical specialty:** ..... **Occupation:** hospital ☐ outpatient clinic ☐ university ☐

**Do you think that your knowledge on the impact of air pollution on health is sufficient?** YES ☐ NO ☐

**What is the main source of your knowledge about the impact of air pollution on health?**

medical studies ☐ medical press ☐ textbooks ☐ internet ☐ press ☐ radio/TV ☐

**Should other physicians, outside of occupational medicine, be educated in the field of air pollution?**

YES ☐ NO ☐

**What form of training in this area do you believe is best for you?**

participation in conferences ☐ reading medical literature ☐ internet searching ☐

information from the media ☐ conversation with colleagues ☐ I do not need it ☐

**Do you know what diseases are caused by air pollution?** YES ☐ NO ☐

**Do you know what levels of air pollution are acceptable by WHO?** YES ☐ NO ☐

**Do you know what levels of air pollution are acceptable in Poland?** YES ☐ NO ☐

**Do you know what the main types of air pollution are in your region?** YES ☐ NO ☐

**Do you follow the current levels of air pollution concentration in your region?** YES ☐ NO ☐

**Do you alert your patients about exceeded permissible limits of air pollution?** YES ☐ NO ☐

**Do you inform your patients about the impact of air pollution upon their health?** YES ☐ NO ☐

**How many deaths per year in Poland may result from exposure to air pollution MP2.5?**

1 000 ☐ 5 000 ☐ 10 000 ☐ 20 000 ☐ 40 000 ☐ I do not know ☐

**What is the main source of air pollution in your city?**

industry ☐ traffic ☐ energy production ☐ ozone ☐ household ☐ no significant pollution ☐ I do not know ☐

**What diseases are caused by inhalation of MP2.5 fine dust?**

myocardial infarction ☐ lung cancer ☐ hypertension ☐ stroke ☐ all these diseases ☐ I do not know ☐

## Questionnaire investigating awareness of patients with respiratory diseases about the impact of air pollution on health

SEX M ☐ F ☐ Age .....years Place of residence (city) .....

1. Do you think that your knowledge on the impact of air pollution on health is sufficient?  
(0 I don't know anything about it; 5 I am very knowledgeable about it)  
1 ☐ 2 ☐ 3 ☐ 4 ☐ 5 ☐
2. What is the main source of your knowledge about the impact of air pollution on health?  
press ☐ radio/TV ☐ internet ☐ general practitioner ☐ specialist ☐ family/friends ☐
3. Do you think the media reports on the health effects of air pollution are exaggerated?  
(0 they are not exaggerated at all; 5 very significantly)  
1 ☐ 2 ☐ 3 ☐ 4 ☐ 5 ☐
4. What lung diseases do you have? .....
5. Comorbidities ? .....
6. To what extent does air pollution affect your health? (0 does not affect at all; 5 is extremely strong)  
1 ☐ 2 ☐ 3 ☐ 4 ☐ 5 ☐
7. Do you know how to protect yourself from the harmful effects of smog? YES ☐ NO ☐
8. Do you know what levels of air pollution are acceptable in Poland? YES ☐ NO ☐
9. Do you know what levels of air pollution are acceptable by WHO?  
lower ☐ higher ☐ the same ☐ I don't know ☐
10. Do you know what the main types of air pollution are in your region? YES ☐ NO ☐
11. Do you follow the current levels of air pollution concentration in your region? YES ☐ NO ☐
12. If so, what sources do you use? radio ☐ TV ☐ internet ☐ mobile application ☐
13. Does information about high concentrations of air pollutants affect your activity?  
(0 does not affect at all; 5 is extremely strong)  
1 ☐ 2 ☐ 3 ☐ 4 ☐ 5 ☐
14. Do you use protective masks with HEPA filters during periods of high smog? YES ☐ NO ☐
15. Do you use an air purifier at home? YES ☐ NO ☐
16. Does your general practitioner inform you about the impact of smog on your health? YES ☐ NO ☐
17. Does your specialist inform you about the impact of smog on your health? YES ☐ NO ☐
18. Do you know what diseases are caused by air pollution? YES ☐ NO ☐
19. How many deaths per year in Poland may result from exposure to air pollution MP2.5?  
1 000 ☐ 5 000 ☐ 10 000 ☐ 20 000 ☐ 40 000 ☐ I do not know ☐
20. What is the main source of air pollution in your city?  
industry ☐ traffic ☐ energy production ☐ ozone ☐ household ☐ no significant pollution ☐ I do not know ☐
21. What diseases are caused by inhalation of MP2.5 fine dust? myocardial infarction ☐ lung cancer ☐  
☐ hypertension ☐ stroke ☐ all these diseases ☐ I do not know ☐
22. Do you think your local authorities' actions in the fight for clean air are sufficient? YES ☐ NO ☐
23. Do you think the government's actions in the fight for clean air are sufficient? YES ☐ NO ☐
24. Can you improve the smog situation in Poland yourself? YES ☐ NO ☐
